# Supplementary material for: Advanced theoretical design of light-driven molecular rotary motors: enhancing thermal helix inversion and visible-light activation
Source: Royal Society of Chemistry journal article supplement (doi:10.1039/d4cp00037d), 2024-01-01
Supplement: d4cp00037d2.pdf [file d4cp00037d2.pdf]

## Supporting Information

### Advanced Theoretical Design of Light-Driven Molecular Rotary Motors: Enhancing Thermal Helix Inversion and Visible-Light Activation

Weiliang Shi,<sup>a</sup> Jianzheng Ma,<sup>b</sup> Chenwei Jiang,<sup>b\*</sup> and Tetsuya Taketsugu<sup>c,d\*</sup>

<sup>a</sup> Graduate School of Chemical Sciences and Engineering, Hokkaido University, Sapporo 060-0810, Japan

<sup>b</sup> Ministry of Education Key Laboratory for Nonequilibrium Synthesis and Modulation of Condensed Matter, Shaanxi Province Key Laboratory of Quantum Information and Quantum Optoelectronic Devices, School of Physics, Xi'an Jiaotong University, Xi'an 710049, China

<sup>c</sup> Department of Chemistry, Faculty of Science, Hokkaido University, Sapporo 060-0810, Japan

<sup>d</sup> Institute for Chemical Reaction Design and Discovery (WPI-ICReDD), Hokkaido University, Sapporo 001-0021, Japan

Chenwei Jiang: [jiangcw@xjtu.edu.cn](mailto:jiangcw@xjtu.edu.cn), Tetsuya Taketsugu: [take@sci.hokudai.ac.jp](mailto:take@sci.hokudai.ac.jp)

#### Table of contents

1. Key structures along the reaction pathway of molecule 1s
2. Key structures along the reaction pathway of molecule 2s
3. Key structures along the reaction pathway of molecule 6s
4. Key structures along the reaction pathway of molecule Xs
5. Excitation energies of the S<sub>1</sub> state in the gas phase and in a solution of dichloromethane solvent
6. Excitation energies and oscillator strengths of the higher electronic states
7. UV-vis spectra calculated at the OM2/MRCI level
8. Analyses of typical trajectories for 1s, 2s, 6s, and Xs
9. Simulated time-dependent fluorescence and dark state
10. Active space orbitals for 1s, 2s, 6s, and Xs

## 1. Key structures along the reaction pathway of molecule 1s

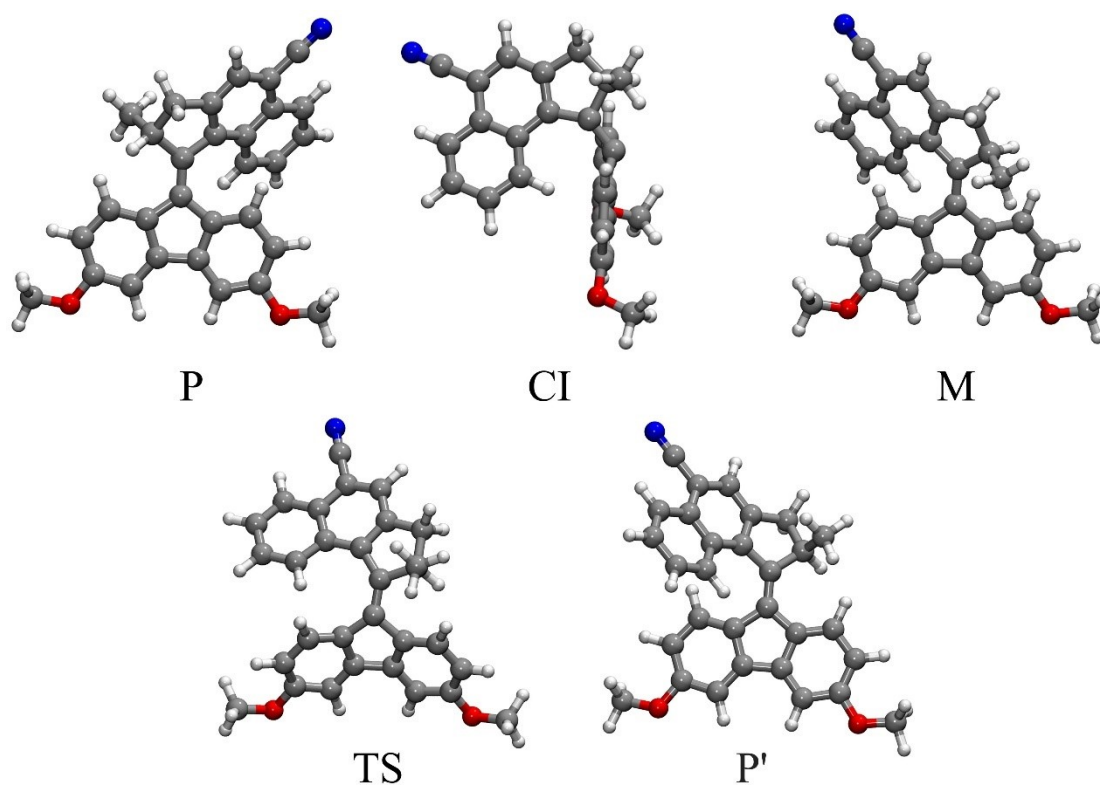

**Figure S1.** Optimized structures of minima, one conical intersection, and one transition state along the reaction pathway of molecule 1s calculated at the OM2/MRCI level.

**Table S1.** Geometrical parameters of optimized equilibrium and transition state structures in the ground state for 1s, calculated by the OM2/MRCI method, using the MNDO99 program,<sup>1</sup> and by B3LYP-D3, CAMB3LYP-D3, M06-2X, and  $\omega$ B97XD methods with 6-31G(d,p) basis sets, using the Gaussian09 program.<sup>2</sup> The bond lengths are given in Å, while bond angles and dihedral angles are given in degrees.

|    |               | OM2/MRCI | B3LYP-D3 | CAMB3LYP-D3 | M06-2X   | $\omega$ B97XD |
|----|---------------|----------|----------|-------------|----------|----------------|
| P  | C1-C2         | 1.35804  | 1.36772  | 1.3547      | 1.35744  | 1.35552        |
|    | C40-C2-C1     | 126.9    | 126.535  | 126.386     | 126.096  | 126.427        |
|    | C2-C1-C4      | 125.904  | 124.632  | 124.769     | 124.59   | 125.032        |
|    | C40-C2-C1-C4  | 21.785   | 21.118   | 20.416      | 19.829   | 20.451         |
|    | C40-C2-C1-C15 | -170.138 | -169.548 | -170.758    | -170.663 | -171.08        |
|    | C2-C28-C40-C1 | -0.527   | -1.359   | -1.35       | -1.507   | -1.365         |
|    | C2-C1-C15-C17 | 40.462   | 40.548   | 41.468      | 40.602   | 42.032         |
| M  | C1-C2         | 1.36331  | 1.3761   | 1.36139     | 1.36391  | 1.36196        |
|    | C40-C2-C1     | 127.978  | 127.949  | 128.215     | 128.366  | 128.128        |
|    | C2-C1-C4      | 124.41   | 124.504  | 125.061     | 124.928  | 125.402        |
|    | C40-C2-C1-C4  | 147.441  | 145.218  | 146.286     | 146.458  | 145.783        |
|    | C40-C2-C1-C15 | -25.392  | -29.015  | -27.457     | -26.842  | -27.091        |
|    | C2-C28-C40-C1 | -1.381   | -1.183   | -1.202      | -1.38    | -1.275         |
|    | C2-C1-C15-C17 | -26.879  | -27.786  | -29.552     | -29.826  | -30.36         |
| TS | C1-C2         | 1.36446  | 1.38357  | 1.36968     | 1.37336  | 1.37064        |
|    | C40-C2-C1     | 120.986  | 122.114  | 121.732     | 121.299  | 121.68         |
|    | C2-C1-C4      | 117.947  | 117.969  | 117.835     | 117.555  | 117.85         |
|    | C40-C2-C1-C4  | -24.731  | -24.094  | -22.119     | -21.646  | -22.346        |
|    | C40-C2-C1-C15 | 142.51   | 139.727  | 144.791     | 145.794  | 144.687        |
|    | C2-C28-C40-C1 | -9.315   | -8.102   | -8.168      | -8.204   | -8.312         |
|    | C2-C1-C15-C17 | 19.901   | 23.183   | 22.516      | 20.848   | 22.417         |
| P' | C1-C2         | 1.35804  | 1.36772  | 1.3547      | 1.35744  | 1.35552        |
|    | C40-C2-C1     | 127.6    | 128.319  | 128.66      | 128.724  | 128.576        |
|    | C2-C1-C4      | 125.903  | 124.632  | 124.769     | 124.59   | 125.032        |
|    | C40-C2-C1-C4  | -156.883 | -155.427 | -156.12     | -156.326 | -156.049       |
|    | C40-C2-C1-C15 | 11.203   | 13.907   | 12.706      | 13.182   | 12.419         |
|    | C2-C28-C40-C1 | 0.526    | 1.359    | 1.35        | 1.507    | 1.365          |
|    | C2-C1-C15-C17 | 40.461   | 40.548   | 41.468      | 40.602   | 42.032         |

**Table S2.** Geometrical parameters of the CI structure between  $S_0$  and  $S_1$  states for 1s calculated by the OM2/MRCI method. The bond lengths are given in Å, while bond angles and dihedral angles are given in degrees.

|    |               |          |
|----|---------------|----------|
| CI | C1-C2         | 1.41331  |
|    | C40-C2-C1     | 96.940   |
|    | C2-C1-C4      | 115.996  |
|    | C40-C2-C1-C4  | -112.117 |
|    | C40-C2-C1-C15 | 54.979   |
|    | C2-C28-C40-C1 | -35.041  |
|    | C2-C1-C15-C17 | 19.312   |

**Table S3.** Energies of the relevant structures in the ground state for 1s, calculated by the OM2/MRCI method (in eV), and by the B3LYP-D3, CAMB3LYP-D3, M06-2X, and  $\omega$ B97XD methods with 6-31G(d,p) basis sets (in Hartree). The energies relative to P are also given in parenthesis (in kcal/mol).

|    | OM2/MRCI            | B3LYP-D3              | CAMB3LYP-D3           | M062X                 | $\omega$ B97XD        |
|----|---------------------|-----------------------|-----------------------|-----------------------|-----------------------|
| P  | -5045.166           | -1362.32954           | -1361.56497           | -1361.70764           | -1361.82290           |
| M  | -5045.081<br>(2.0)  | -1362.32354<br>(3.8)  | -1361.55784<br>(4.5)  | -1361.70076<br>(4.3)  | -1361.81584<br>(4.4)  |
| TS | -5044.222<br>(21.8) | -1362.28838<br>(25.8) | -1361.52354<br>(26.0) | -1361.66602<br>(26.1) | -1361.78155<br>(26.0) |

## 2. Key structures along the reaction pathway of molecule 2s

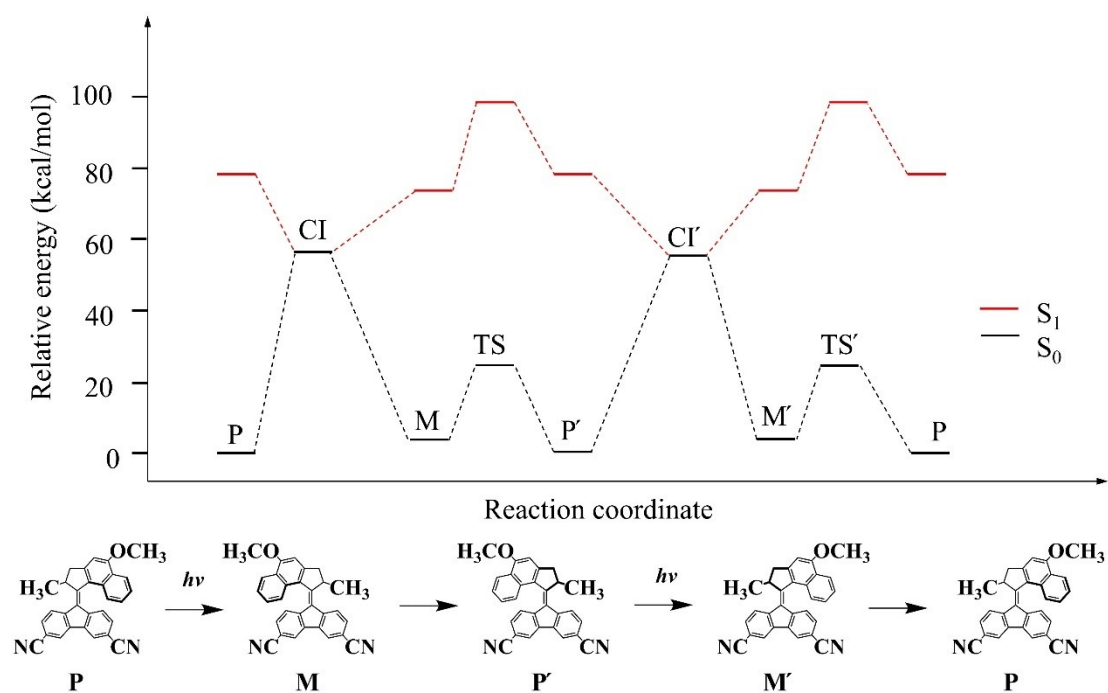

**Figure S2.** The energy profiles of  $S_0$  and  $S_1$  states of a rotation cycle for the molecule 2s ( $P \rightarrow M \rightarrow P' \rightarrow M' \rightarrow P$ ) at the OM2/MRCI level; CI and TS denote conical intersection and transition state, respectively.

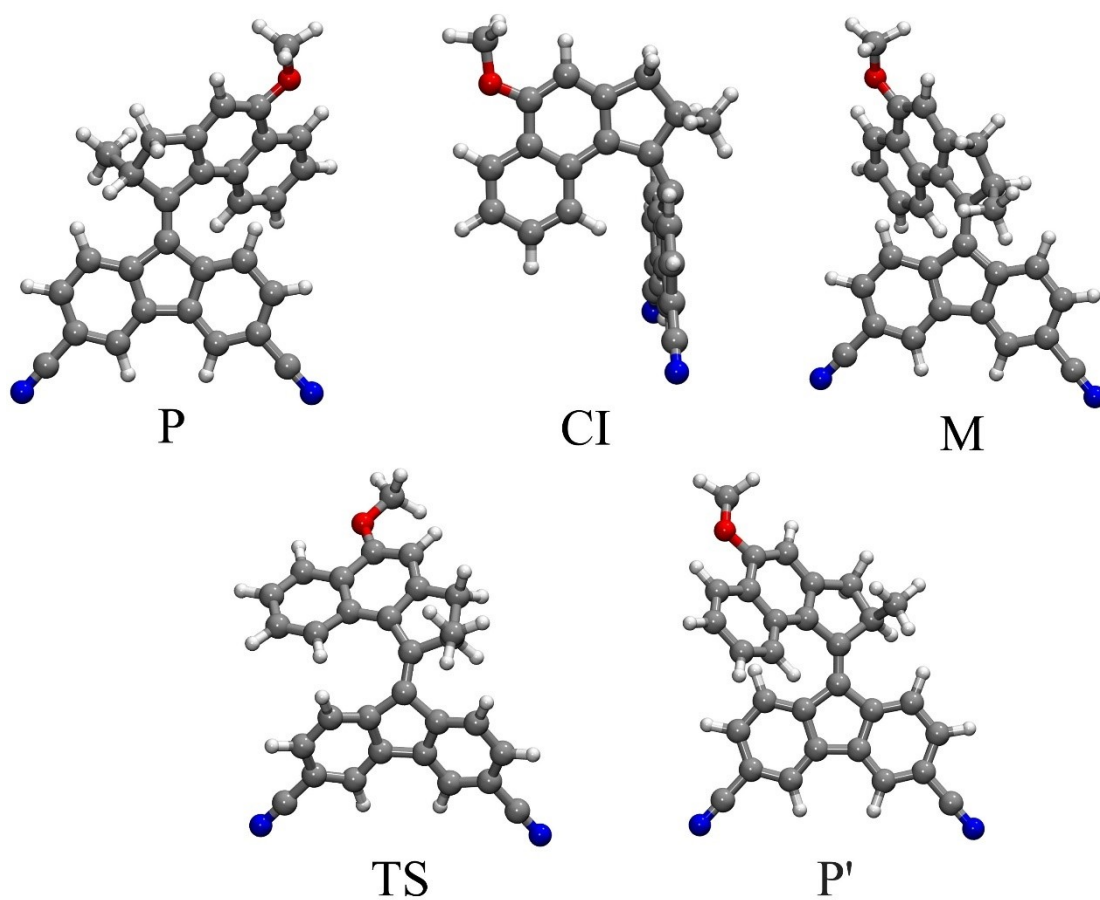

**Figure S3.** Optimized structures of minima, one conical intersection, and one transition state along the reaction pathway of molecule 2s calculated at the OM2/MRCI level.

**Table S4.** Geometrical parameters of optimized equilibrium and transition state structures in the ground state for 2s, calculated by the OM2/MRCI method, using the MNDO99 program,<sup>1</sup> and by B3LYP-D3, CAMB3LYP-D3, M06-2X, and  $\omega$ B97XD methods with 6-31G(d,p) basis sets, using the Gaussian09 program.<sup>2</sup> The bond lengths are given in Å, while bond angles and dihedral angles are given in degrees.

|    |               | OM2/MRCI | B3LYP-D3 | CAM-B3LYP-D3 | M06-2X   | $\omega$ B97XD |
|----|---------------|----------|----------|--------------|----------|----------------|
| P  | C1-C2         | 1.36244  | 1.37408  | 1.36111      | 1.36373  | 1.36217        |
|    | C40-C2-C1     | 127.136  | 126.811  | 126.682      | 126.466  | 126.733        |
|    | C2-C1-C4      | 125.498  | 124.365  | 124.468      | 124.204  | 124.61         |
|    | C40-C2-C1-C4  | 21.189   | 21.188   | 20.288       | 19.633   | 20.533         |
|    | C40-C2-C1-C15 | -169.491 | -167.68  | -168.969     | -169.132 | -168.652       |
|    | C2-C28-C40-C1 | -0.94    | -1.486   | -1.542       | -1.686   | -1.297         |
|    | C2-C1-C15-C17 | 39.236   | 37.796   | 38.809       | 37.881   | 38.548         |
| M  | C1-C2         | 1.367    | 1.38365  | 1.3698       | 1.37196  | 1.37077        |
|    | C40-C2-C1     | 127.561  | 127.504  | 127.705      | 127.775  | 127.747        |
|    | C2-C1-C4      | 124.112  | 123.731  | 124.076      | 123.962  | 124.088        |
|    | C40-C2-C1-C4  | 146.833  | 144.009  | 145.301      | 145.919  | 145.078        |
|    | C40-C2-C1-C15 | -26.653  | -30.574  | -29.107      | -28.197  | -28.967        |
|    | C2-C28-C40-C1 | -1.713   | -1.343   | -1.319       | -1.293   | -1.425         |
|    | C2-C1-C15-C17 | -26.159  | -25.278  | -26.561      | -26.616  | -26.635        |
| TS | C1-C2         | 1.37     | 1.39052  | 1.37641      | 1.37956  | 1.37751        |
|    | C40-C2-C1     | 121.347  | 121.658  | 121.385      | 121.007  | 121.391        |
|    | C2-C1-C4      | 117.714  | 117.878  | 117.644      | 117.349  | 117.701        |
|    | C40-C2-C1-C4  | -25.973  | -25.947  | -24.752      | -23.953  | -25.633        |
|    | C40-C2-C1-C15 | 140.72   | 139.347  | 142.667      | 143.871  | 141.809        |
|    | C2-C28-C40-C1 | -9.361   | -9.179   | -9.323       | -9.34    | -9.508         |
|    | C2-C1-C15-C17 | 19.445   | 21.305   | 20.293       | 19.016   | 19.298         |
| P' | C1-C2         | 1.36243  | 1.37408  | 1.36112      | 1.36373  | 1.36217        |
|    | C40-C2-C1     | 127.214  | 127.734  | 128.023      | 128.027  | 127.944        |
|    | C2-C1-C4      | 125.499  | 124.365  | 124.468      | 124.204  | 124.61         |
|    | C40-C2-C1-C4  | -156.435 | -155.071 | -155.798     | -156.111 | -156.18        |
|    | C40-C2-C1-C15 | 12.872   | 16.061   | 14.945       | 15.125   | 14.636         |
|    | C2-C28-C40-C1 | 0.949    | 1.486    | 1.543        | 1.687    | 1.297          |
|    | C2-C1-C15-C17 | 39.256   | 37.796   | 38.809       | 37.88    | 38.547         |

**Table S5.** Geometrical parameters of the CI structure between  $S_0$  and  $S_1$  states for 2s calculated by the OM2/MRCI method. The bond lengths are given in Å, while bond angles and dihedral angles are given in degrees.

|    |               |          |
|----|---------------|----------|
| CI | C1-C2         | 1.41136  |
|    | C40-C2-C1     | 116.416  |
|    | C2-C1-C4      | 118.624  |
|    | C40-C2-C1-C4  | -115.421 |
|    | C40-C2-C1-C15 | 61.837   |
|    | C2-C28-C40-C1 | -25.085  |
|    | C2-C1-C15-C17 | 3.152    |

**Table S6.** Energies of the relevant structures in the ground state for 2s, calculated by the OM2/MRCI method (in eV), and by the B3LYP-D3, CAMB3LYP-D3, M06-2X, and  $\omega$ B97XD methods with 6-31G(d,p) basis sets (in Hartree). The energies relative to P are also given in parenthesis (in kcal/mol).

|    | OM2/MRCI            | B3LYP-D3              | CAMB3LYP-D3           | M062X                 | $\omega$ B97XD        |
|----|---------------------|-----------------------|-----------------------|-----------------------|-----------------------|
| P  | -4882.130           | -1340.04773           | -1339.28776           | -1339.44615           | -1339.54261           |
| M  | -4882.057<br>(1.7)  | -1340.04351<br>(2.7)  | -1339.28239<br>(3.4)  | -1339.44095<br>(3.3)  | -1339.53729<br>(3.3)  |
| TS | -4881.165<br>(22.3) | -1340.00606<br>(26.2) | -1339.24581<br>(26.3) | -1339.40409<br>(26.4) | -1339.50077<br>(26.3) |



### 3. Key structures along the reaction pathway of molecule 6s

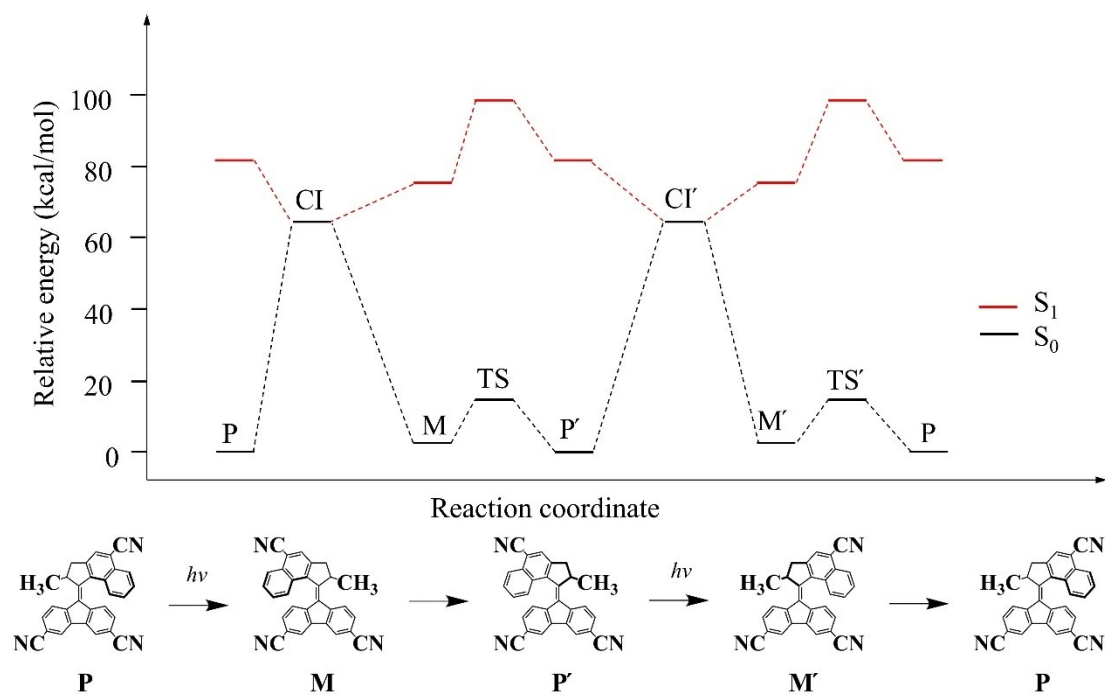

**Figure S4.** The energy profiles of  $S_0$  and  $S_1$  states of a rotation cycle for the molecule 6s ( $P \rightarrow M \rightarrow P' \rightarrow M' \rightarrow P$ ) at the OM2/MRCI level; CI and TS denote conical intersection and transition state, respectively.

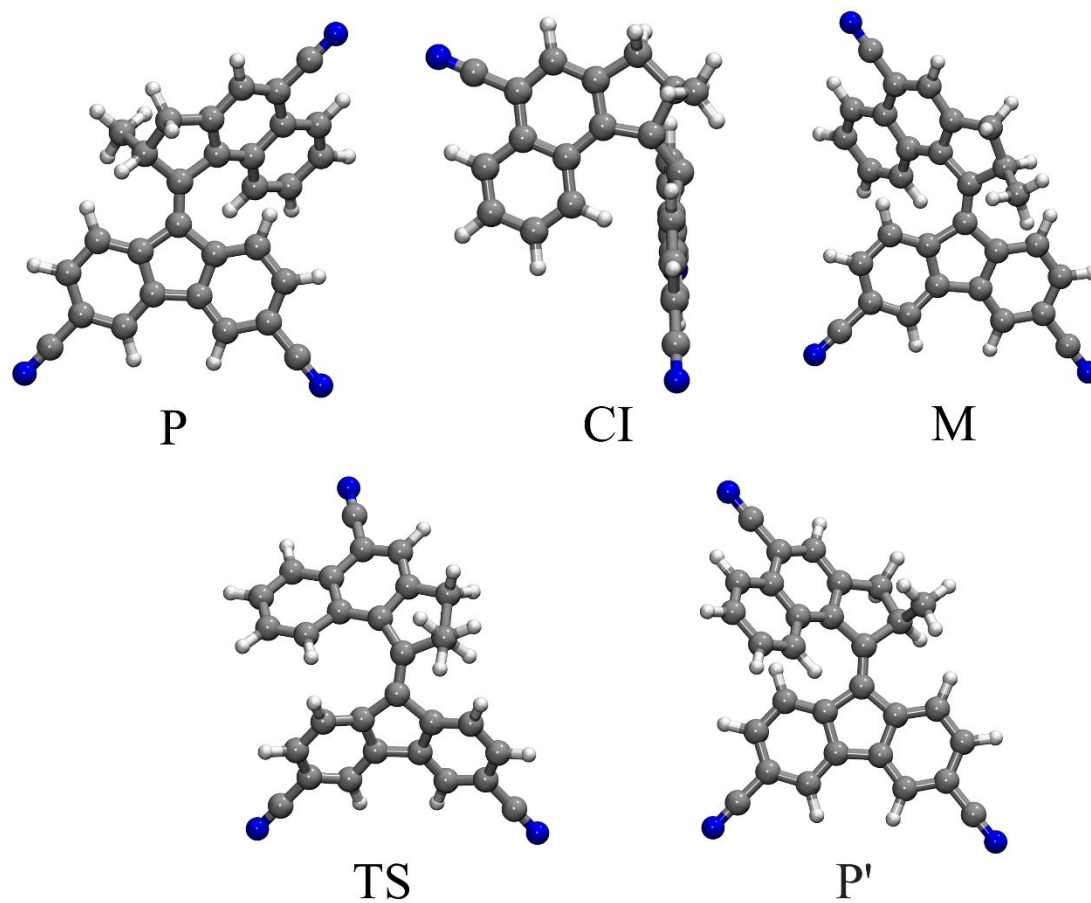

**Figure S5.** Optimized structures of minima, one conical intersection, and one transition state along the reaction pathway of molecule 6s calculated at the OM2/MRCI level.

**Table S7.** Geometrical parameters of optimized equilibrium and transition state structures in the ground state for 6s, calculated by the OM2/MRCI method, using the MNDO99 program,<sup>1</sup> and by B3LYP-D3, CAMB3LYP-D3, M06-2X, and  $\omega$ B97XD methods with 6-31G(d,p) basis sets, using the Gaussian09 program.<sup>2</sup> The bond lengths are given in Å, while bond angles and dihedral angles are given in degrees.

|    |               | OM2/MRCI | B3LYP-D3 | CAM-B3LYP-D3 | M06-2X   | WB97XD   |
|----|---------------|----------|----------|--------------|----------|----------|
| P  | C1-C2         | 1.35898  | 1.36989  | 1.35707      | 1.35968  | 1.35804  |
|    | C40-C2-C1     | 126.835  | 126.579  | 126.42       | 126.241  | 126.426  |
|    | C2-C1-C4      | 125.955  | 124.703  | 124.834      | 124.667  | 124.999  |
|    | C40-C2-C1-C4  | 21.6     | 21.599   | 20.799       | 20.296   | 20.941   |
|    | C40-C2-C1-C15 | -169.998 | -168.293 | -169.6       | -169.462 | -169.603 |
|    | C2-C28-C40-C1 | -0.882   | -1.347   | -1.405       | -1.44    | -1.294   |
|    | C2-C1-C15-C17 | 40.284   | 39.438   | 40.506       | 39.352   | 40.588   |
| M  | C1-C2         | 1.36383  | 1.3787   | 1.36441      | 1.36678  | 1.36501  |
|    | C40-C2-C1     | 127.85   | 127.689  | 127.928      | 128.025  | 127.857  |
|    | C2-C1-C4      | 124.585  | 124.304  | 124.786      | 124.65   | 125.075  |
|    | C40-C2-C1-C4  | 146.698  | 144.398  | 145.497      | 146.125  | 144.741  |
|    | C40-C2-C1-C15 | -26.35   | -29.937  | -28.508      | -27.649  | -28.44   |
|    | C2-C28-C40-C1 | -1.707   | -1.211   | -1.24        | -1.191   | -1.479   |
|    | C2-C1-C15-C17 | -26.792  | -26.783  | -28.357      | -28.262  | -29.206  |
| TS | C1-C2         | 1.36663  | 1.38642  | 1.37254      | 1.37609  | 1.37341  |
|    | C40-C2-C1     | 121.58   | 121.673  | 121.396      | 120.999  | 121.469  |
|    | C2-C1-C4      | 118.444  | 118.203  | 117.954      | 117.69   | 118.095  |
|    | C40-C2-C1-C4  | -24.553  | -25.939  | -24.65       | -24.364  | -26.086  |
|    | C40-C2-C1-C15 | 140.401  | 138.229  | 141.927      | 142.268  | 139.706  |
|    | C2-C28-C40-C1 | -8.77    | -8.808   | -8.871       | -8.964   | -9.125   |
|    | C2-C1-C15-C17 | 21.484   | 22.235   | 21.217       | 19.69    | 20.136   |
| P' | C1-C2         | 1.35898  | 1.36989  | 1.36989      | 1.35968  | 1.35804  |
|    | C40-C2-C1     | 127.541  | 128.028  | 128.028      | 128.329  | 128.304  |
|    | C2-C1-C4      | 125.958  | 124.703  | 124.703      | 124.667  | 124.998  |
|    | C40-C2-C1-C4  | -156.177 | -154.997 | -154.997     | -156.057 | -155.769 |
|    | C40-C2-C1-C15 | 12.228   | 15.112   | 15.112       | 14.186   | 13.688   |
|    | C2-C28-C40-C1 | 0.879    | 1.347    | 1.347        | 1.44     | 1.294    |
|    | C2-C1-C15-C17 | 40.287   | 39.438   | 39.438       | 39.353   | 40.588   |

**Table S8.** Geometrical parameters of the CI structure between  $S_0$  and  $S_1$  states for 6s, calculated by the OM2/MRCI method. The bond lengths are given in Å, while bond angles and dihedral angles are given in degrees.

|    |               |          |
|----|---------------|----------|
| CI | C1-C2         | 1.41232  |
|    | C40-C2-C1     | 103.484  |
|    | C2-C1-C4      | 116.705  |
|    | C40-C2-C1-C4  | -114.918 |
|    | C40-C2-C1-C15 | 55.426   |
|    | C2-C28-C40-C1 | -32.841  |
|    | C2-C1-C15-C17 | 12.953   |

**Table S9.** Energies of the relevant structures in the ground state for 6s, calculated by the OM2/MRCI method (in eV), and by the B3LYP-D3, CAMB3LYP-D3, M06-2X, and  $\omega$ B97XD methods with 6-31G(d,p) basis sets (in Hartree). The energies relative to P are also given in parenthesis (in kcal/mol).

|    | OM2/MRCI            | B3LYP-D3              | CAMB3LYP-D3           | M062X                 | $\omega$ B97XD        |
|----|---------------------|-----------------------|-----------------------|-----------------------|-----------------------|
| P  | -4718.473           | -1317.75644           | -1317.00065           | -1317.17537           | -1317.25304           |
| M  | -4718.389<br>(1.9)  | -1317.75117<br>(3.3)  | -1316.99421<br>(4.0)  | -1317.16911<br>(3.9)  | -1317.24659<br>(4.0)  |
| TS | -4717.522<br>(21.9) | -1317.71460<br>(26.3) | -1316.95834<br>(26.5) | -1317.13286<br>(26.7) | -1317.21080<br>(26.5) |

#### 4. Key structures along the reaction pathway of molecule Xs

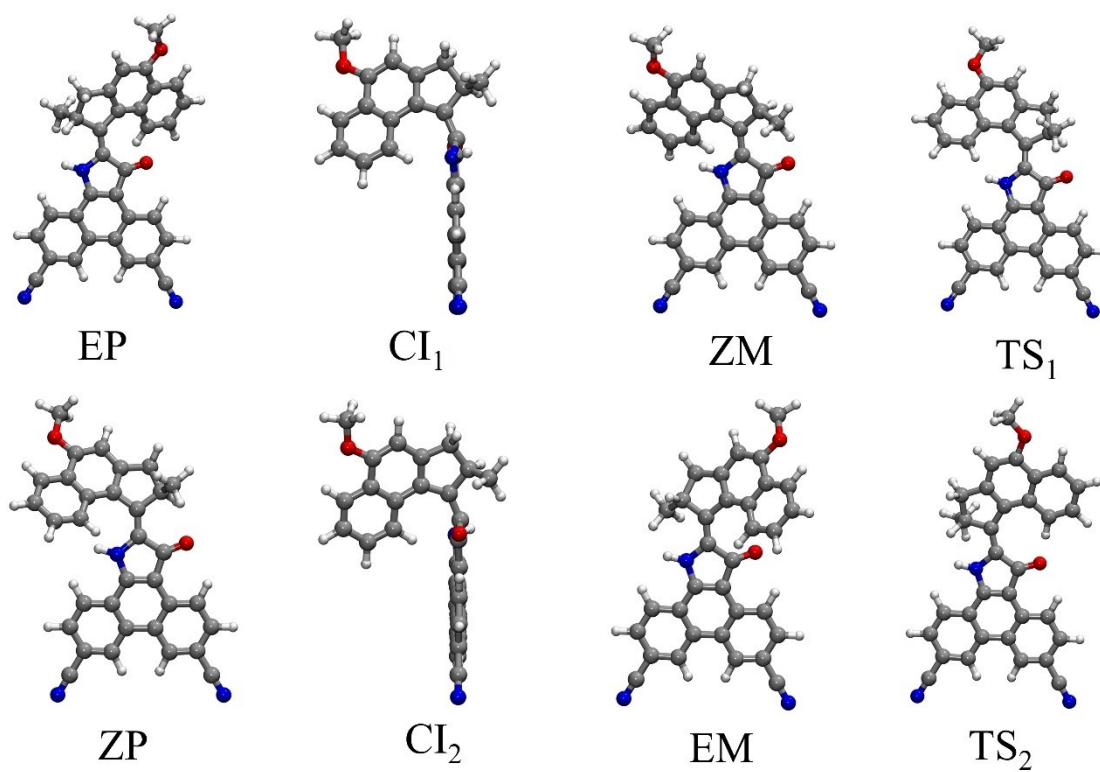

**Figure S6.** Optimized structures of minima, conical intersections, and transition states along the reaction pathway of molecule Xs calculated at the OM2/MRCI level.

**Table S10.** Geometrical parameters of optimized equilibrium and transition state structures in the ground state for Xs, calculated by the OM2/MRCI method, using the MNDO99 program,<sup>1</sup> and by B3LYP-D3, CAMB3LYP-D3, M06-2X, and  $\omega$ B97XD methods with 6-31G(d,p) basis sets, using the Gaussian09 program.<sup>2</sup> The bond lengths are given in Å, while bond angles and dihedral angles are given in degrees.

|     |               | OM2/MRCI | B3LYP-D3 | CAM-B3LYP-D3 | M06-2X   | WB97XD   |
|-----|---------------|----------|----------|--------------|----------|----------|
| EP  | C1-C2         | 1.36942  | 1.36419  | 1.35219      | 1.35451  | 1.3543   |
|     | C40-C2-C1     | 121.753  | 122.046  | 122.228      | 122.385  | 121.928  |
|     | C2-C1-C4      | 129.564  | 130.965  | 131.198      | 130.97   | 131.214  |
|     | C40-C2-C1-C4  | 10.601   | 10.096   | 9.477        | 8.684    | 9.52     |
|     | C40-C2-C1-C15 | -177.726 | -176.97  | -177.985     | -179.27  | -178.09  |
|     | C2-C28-C40-C1 | 4.06     | 5.214    | 5.091        | 5.511    | 5.218    |
|     | C2-C1-C15-C17 | 30.966   | 30.427   | 31.366       | 31.89    | 32.103   |
| ZM  | C1-C2         | 1.36982  | 1.36793  | 1.35618      | 1.35758  | 1.35802  |
|     | C40-C2-C1     | 123.841  | 126.638  | 127.098      | 123.916  | 123.588  |
|     | C2-C1-C4      | 125.563  | 130.516  | 130.624      | 125.645  | 126.056  |
|     | C40-C2-C1-C4  | 163.12   | 162.916  | 163.705      | 160.136  | 160.544  |
|     | C40-C2-C1-C15 | -5.823   | -7.113   | -6.271       | -9.365   | -9.637   |
|     | C2-C28-C40-C1 | -1.487   | -0.683   | -0.67        | -1.135   | -1.457   |
|     | C2-C1-C15-C17 | -30.039  | -13.217  | -13.117      | -29.498  | -28.605  |
| TS1 | C1-C2         | 1.37169  | 1.37165  | 1.36005      | 1.3624   | 1.36188  |
|     | C40-C2-C1     | 129.854  | 128.315  | 128.556      | 128.58   | 128.137  |
|     | C2-C1-C4      | 134.649  | 135.526  | 135.399      | 135.434  | 135.358  |
|     | C40-C2-C1-C4  | -179.489 | -177.662 | -178.657     | -179.469 | -177.655 |
|     | C40-C2-C1-C15 | -5.088   | -4.575   | -3.711       | -2.785   | -4.958   |
|     | C2-C28-C40-C1 | -2.398   | -3.361   | -3.566       | -3.971   | -3.793   |
|     | C2-C1-C15-C17 | 17.746   | 12.818   | 13.355       | 12.946   | 14.367   |
| ZP  | C1-C2         | 1.36593  | 1.36178  | 1.35035      | 1.35287  | 1.35223  |
|     | C40-C2-C1     | 126.864  | 126.493  | 126.903      | 127.077  | 126.389  |
|     | C2-C1-C4      | 128.289  | 129.523  | 129.547      | 129.44   | 129.162  |
|     | C40-C2-C1-C4  | -170.801 | -168.852 | -169.122     | -169.133 | -169.63  |
|     | C40-C2-C1-C15 | -4.392   | 1.501    | 1.182        | 0.826    | -0.04    |
|     | C2-C28-C40-C1 | 0.09     | -1.672   | -1.634       | -2.086   | -1.752   |
|     | C2-C1-C15-C17 | 33.045   | 27.369   | 27.583       | 27.084   | 28.015   |
| EM  | C1-C2         | 1.37008  | 1.36667  | 1.35423      | 1.35638  | 1.35703  |
|     | C40-C2-C1     | 124.427  | 124.101  | 124.568      | 124.636  | 124.16   |
|     | C2-C1-C4      | 125.925  | 127.795  | 127.852      | 127.672  | 127.634  |
|     | C40-C2-C1-C4  | -15.286  | -15.552  | -14.147      | -14.313  | -15.487  |
|     | C40-C2-C1-C15 | 171.35   | 170.469  | 172.936      | 172.656  | 170.871  |
|     | C2-C28-C40-C1 | -3.854   | -4.841   | -4.687       | -4.786   | -4.726   |
|     | C2-C1-C15-C17 | -30.243  | -30.551  | -33.004      | -33.14   | -31.639  |

|     |               |         |         |         |         |         |
|-----|---------------|---------|---------|---------|---------|---------|
| TS2 | C1-C2         | 1.38233 | 1.3852  | 1.37165 | 1.37442 | 1.37376 |
|     | C40-C2-C1     | 118.168 | 117.287 | 117.477 | 117.364 | 117.307 |
|     | C2-C1-C4      | 136.885 | 138.813 | 139.096 | 139.301 | 138.927 |
|     | C40-C2-C1-C4  | -5.25   | -8.432  | -8.136  | -7.905  | -8.523  |
|     | C40-C2-C1-C15 | 171.155 | 170.772 | 171.432 | 172.254 | 170.103 |
|     | C2-C28-C40-C1 | -2.147  | -1.858  | -2.007  | -1.917  | -2.227  |
|     | C2-C1-C15-C17 | 13.135  | 7.982   | 7.181   | 7.099   | 8.624   |

**Table S11.** Geometrical parameters of the CI<sub>1</sub> and CI<sub>2</sub> structures between S<sub>0</sub> and S<sub>1</sub> states for Xs, calculated by the OM2/MRCI method. The bond lengths are given in Å, while bond angles and dihedral angles are given in degrees.

|                 |               | OM2/MRCI |
|-----------------|---------------|----------|
| CI <sub>1</sub> | C1-C2         | 1.40915  |
|                 | C40-C2-C1     | 124.397  |
|                 | C2-C1-C4      | 130.702  |
|                 | C40-C2-C1-C4  | -118.012 |
|                 | C40-C2-C1-C15 | 74.254   |
|                 | C2-C28-C40-C1 | 21.238   |
|                 | C2-C1-C15-C17 | -8.935   |
| CI <sub>2</sub> | C1-C2         | 1.40818  |
|                 | C40-C2-C1     | 125.556  |
|                 | C2-C1-C4      | 130.535  |
|                 | C40-C2-C1-C4  | 118.805  |
|                 | C40-C2-C1-C15 | -76.244  |
|                 | C2-C28-C40-C1 | -20.878  |
|                 | C2-C1-C15-C17 | 12.413   |

**Table S12.** Energies of the relevant structures in the ground state for Xs, calculated by the OM2/MRCI method (in eV), and by the B3LYP-D3, CAMB3LYP-D3, M06-2X, and ωB97XD methods with 6-31G(d,p) basis sets (in Hartree). The energies relative to EP are also given in parenthesis (in kcal/mol).

|     | OM2/MRCI              | B3LYP-D3              | CAMB3LYP-D3            | M062X                  | ωB97XD                 |
|-----|-----------------------|-----------------------|------------------------|------------------------|------------------------|
| EP  | -5823.673             | -1584.97270           | -1584.09429            | -1584.26499            | -1584.37052            |
| ZM  | -5823.81815<br>(-3.4) | -1584.97501<br>(-1.5) | -1584.10671<br>(-7.8)  | -1584.27422<br>(-5.8)  | -1584.38103<br>(-6.6)  |
| TS1 | -5823.645<br>(0.7)    | -1584.96585<br>(4.3)  | -1584.09820<br>(-2.5)  | -1584.26679<br>(-1.1)  | -1584.37327<br>(-1.7)  |
| ZP  | -5823.935<br>(-6.0)   | -1584.98174<br>(-5.7) | -1584.11394<br>(-12.3) | -1584.28305<br>(-11.3) | -1584.38954<br>(-11.9) |
| EM  | -5823.588<br>(2.0)    | -1584.96833<br>(2.7)  | -1584.10007<br>(-3.6)  | -1584.26987<br>(-3.1)  | -1584.37562<br>(-3.2)  |
| TS2 | -5823.499<br>(4.0)    | -1584.95836<br>(9.0)  | -1584.08996<br>(2.7)   | -1584.25845<br>(4.1)   | -1584.36531<br>(3.3)   |



## 5. Excitation energies of the S<sub>1</sub> state in the gas phase and in a solution of dichloromethane solvent

**Table S13.** The absorption wavelengths (in nm) and excitation energies (in eV) for the S<sub>1</sub> state of the molecules 1s-P, 2s-P, 6s-P, Xs-EP, and Xs-ZP, calculated by TDDFT and TDDFT(DCM) with PBE0-D3/6-31G(d,p). TDDFT(DCM) refers to the values calculated using the Polarizable Continuum Model (PCM) to include the effects of the dichloromethane (DCM) solvent. The experimental data for 1s-P, 2s-P, and 6s-P measured in DCM solvents<sup>3</sup> are also presented. When comparing the calculated values with experimental data, they generally align well. Specifically, for 2s-P, the results incorporating solvent effects show a particularly close match with experimental values.

|       | TDDFT       | TDDFT(DCM)  | Exp.     |
|-------|-------------|-------------|----------|
| 1s-P  | 445.28/2.78 | 463.46/2.68 | 422/2.94 |
| 2s-P  | 422.21/2.94 | 447.24/2.77 | 453/2.74 |
| 6s-P  | 425.22/2.92 | 443.54/2.79 | 421/2.95 |
| Xs-EP | 482.98/2.57 | 499.28/2.48 |          |
| Xs-ZP | 465.76/2.66 | 487.28/2.54 |          |

## 6. Excitation energies and oscillator strengths of the higher electronic states

**Table S14.** Excitation energies (in eV) and oscillator strengths of the electronic states, ranging from  $S_1$  to  $S_6$ , for 1s-P, 2s-P, 6s-P, Xs-ZP, and Xs-EP, using the PBE0-D3/6-31G(d,p) level of theory. Based on the oscillator strengths obtained, the primary excited state for is identified as  $S_1$ .

|       | 1s-P        | 2s-P        | 6s-P        | Xs-EP       | Xs-ZP       |
|-------|-------------|-------------|-------------|-------------|-------------|
| $S_1$ | 2.78/0.4930 | 2.94/0.6858 | 2.92/0.6656 | 2.57/0.3928 | 2.66/0.4190 |
| $S_2$ | 2.99/0.0553 | 3.39/0.0002 | 3.11/0.0005 | 2.90/0.2101 | 3.07/0.1746 |
| $S_3$ | 3.55/0.1094 | 3.76/0.0258 | 3.46/0.0213 | 3.15/0.1635 | 3.17/0.0410 |
| $S_4$ | 3.78/0.0453 | 3.84/0.0149 | 3.88/0.0298 | 3.39/0.0286 | 3.44/0.0109 |
| $S_5$ | 3.90/0.0505 | 4.04/0.0006 | 3.99/0.0292 | 3.57/0.1123 | 3.52/0.0897 |
| $S_6$ | 4.02/0.0026 | 4.15/0.0292 | 4.04/0.0185 | 3.74/0.0261 | 3.78/0.0284 |

## 7. UV-vis spectra calculated at the OM2/MRCI level

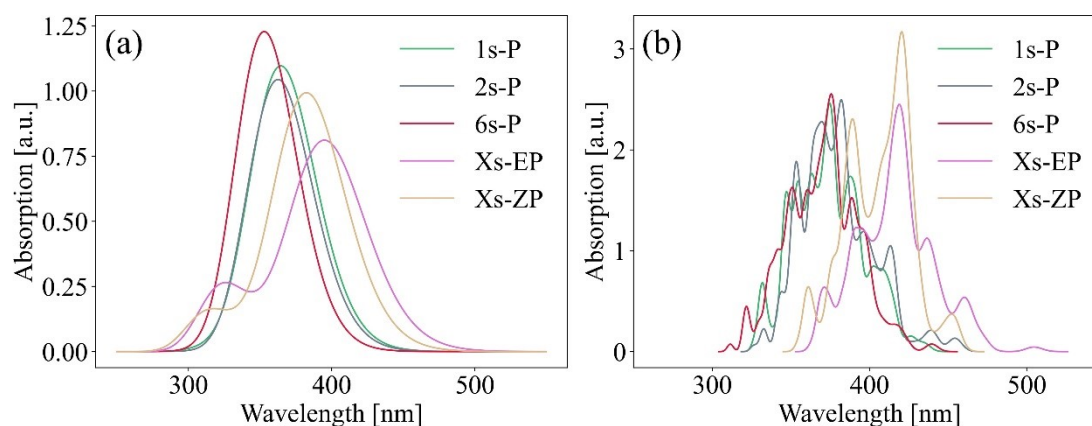

**Figure S7.** The UV-vis spectra calculated for 1s, 2s, 6s, and Xs at the OM2/MRCI level: (a) generated from the absorption at the equilibrium structure; (b) generated from 200 geometries around equilibrium structures from Wigner sampling. The  $S_0 \rightarrow S_1$  excitation energy has been broadened to a full width at half maximum (FWHM) of 0.05 eV using the Newton-X 2.6 program<sup>4</sup>.

Figure S7 shows the UV-vis spectra calculated for 1s, 2s, 6s, and Xs at the OM2/MRCI level: (a) generated from the absorption at the equilibrium structure; (b) generated from 200 geometries around equilibrium structures from Wigner sampling. By comparing panels (a) and (b), one can observe the extent to which the absorption spectra are influenced by molecules whose structures are distributed near the equilibrium structure via Wigner sampling. Although multiple peaks appear for each molecule, the peaks showing the maximum absorption intensity do not deviate significantly from the equilibrium structure.

## 8. Analyses of typical trajectories for 1s, 2s, 6s, and Xs

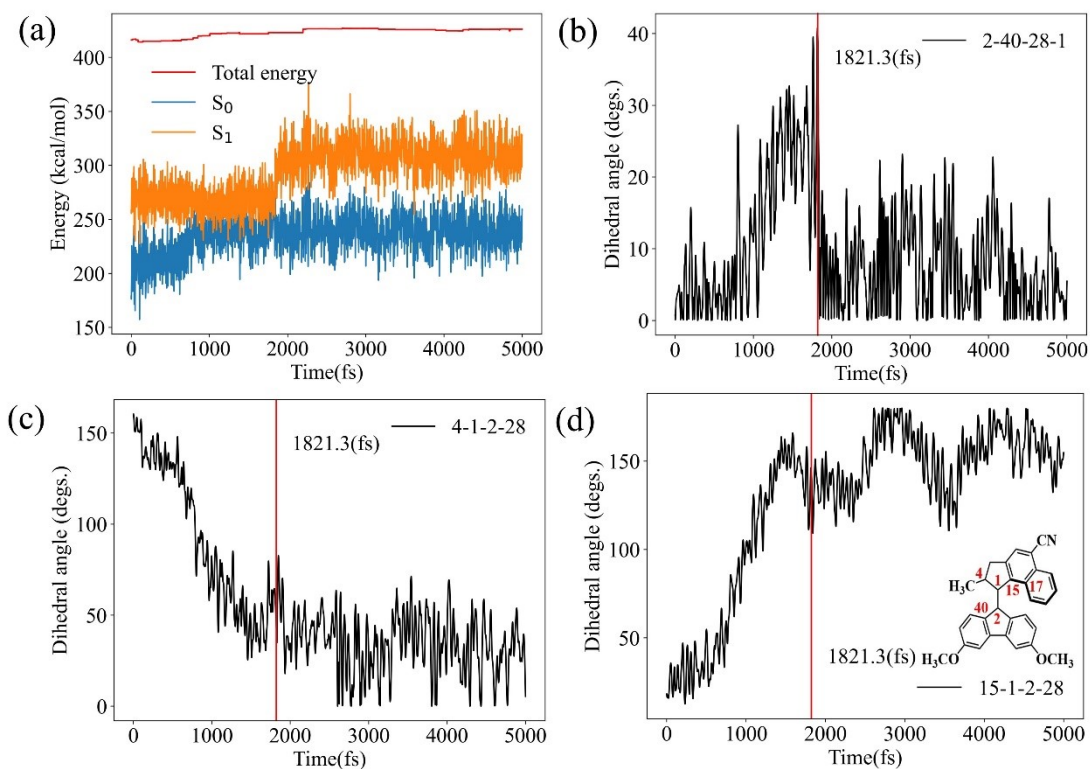

**Figure S8.** (a) Variation of  $S_0$  and  $S_1$  energies and (b-d) variations of the dihedral angles  $\theta_{2-40-28-1}$ ,  $\theta_{4-1-2-28}$ , and  $\theta_{15-1-2-28}$ , along a typical trajectory for 1s. In (a), the total energy is displayed in red. Surface hopping from  $S_1$  to  $S_0$  occurs at 1821.3 fs.

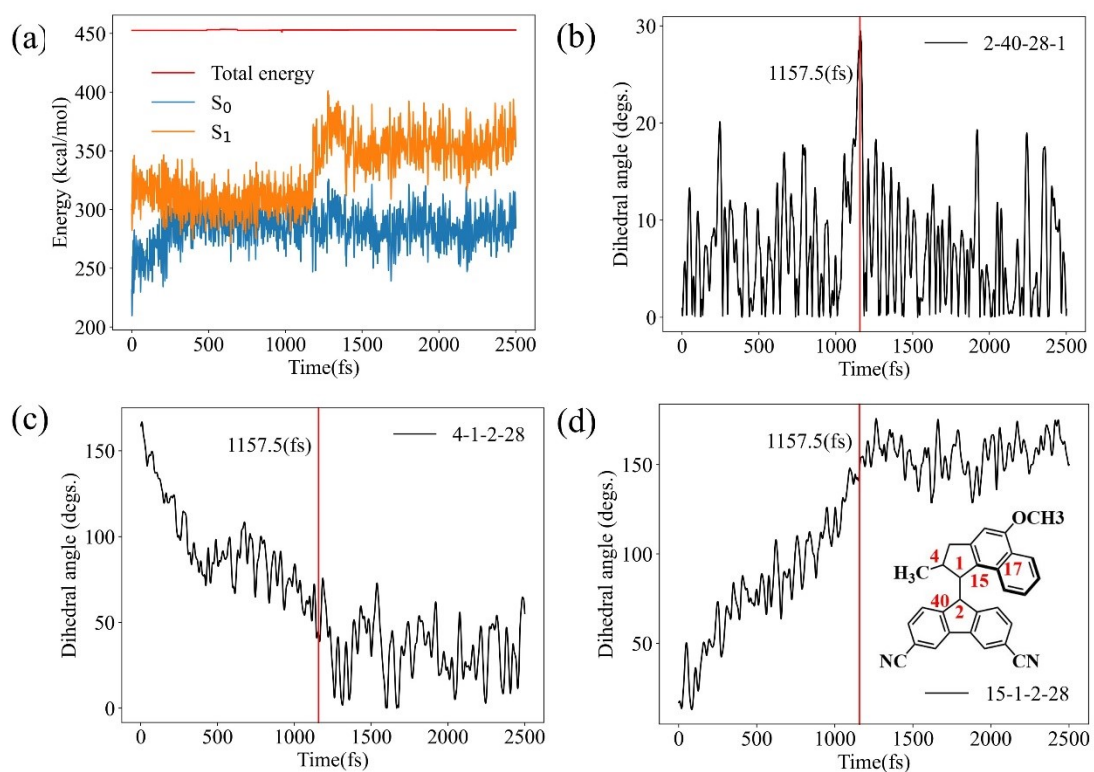

**Figure S9.** (a) Variation of  $S_0$  and  $S_1$  energies and (b-d) variations of the dihedral angles  $\theta_{2-40-28-1}$ ,

$\theta_{4-1-2-28}$ , and  $\theta_{15-1-2-28}$ , along a typical trajectory for 2s. In (a), the total energy is displayed in red. Surface hopping from  $S_1$  to  $S_0$  occurs at 2949.1 fs.

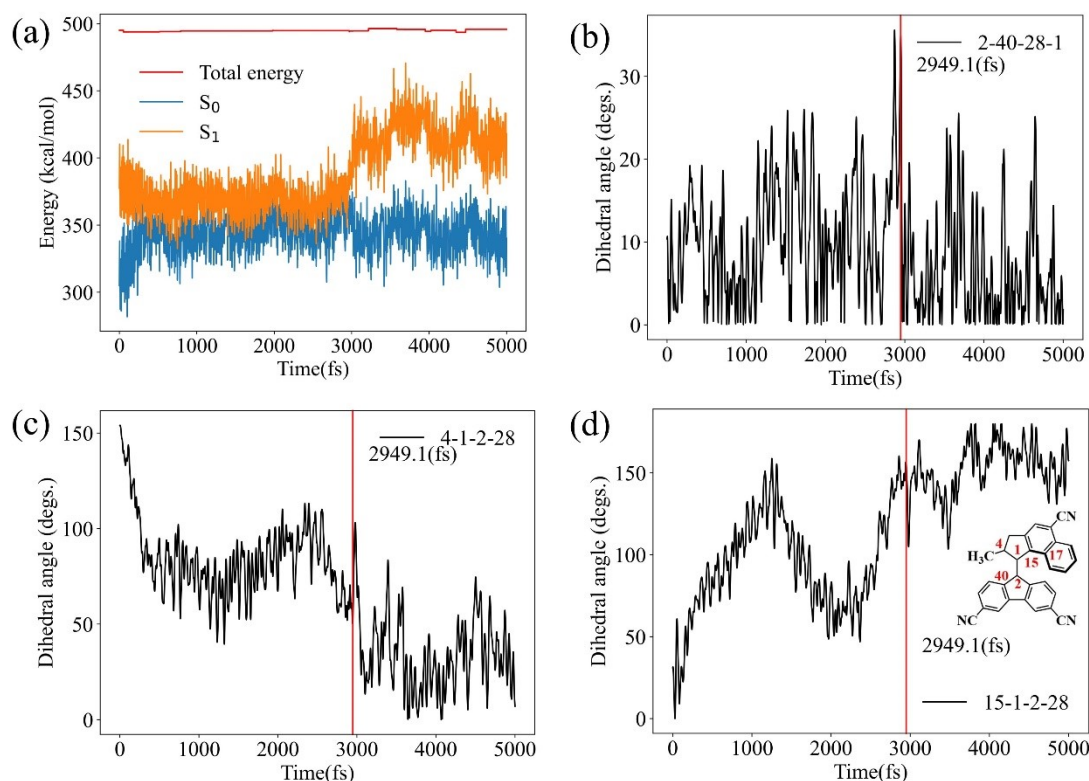

**Figure S10.** (a) Variation of  $S_0$  and  $S_1$  energies and (b-d) variations of the dihedral angles  $\theta_{2-40-28-1}$ ,  $\theta_{4-1-2-28}$ , and  $\theta_{15-1-2-28}$ , along a typical trajectory for 6s. In (a), the total energy is displayed in red. Surface hopping from  $S_1$  to  $S_0$  occurs at 1157.5 fs.

To deepen our understanding of the photoisomerization process in 1s, 2s, and 6s, we have detailed the behavior of crucial angles, specifically,  $\theta_{2-40-28-1}$ ,  $\theta_{4-1-2-28}$ , and  $\theta_{15-1-2-28}$ , across characteristic trajectories. These figures reveal the dihedral angles  $\theta_{4-1-2-28}$  evolving from initial setups to the conical intersection points at 1821.3, 1157.5 and 2949.1 fs, respectively, before hopping to the  $S_0$  state. Throughout this decay, the dihedral angle  $\theta_{4-1-2-28}$  shows a decrease marked by minor fluctuations, in contrast to the dihedral angle  $\theta_{15-1-2-28}$ , which exhibits a steady increase. Approaching the conical intersection, the angle  $\theta_{2-40-28-1}$  shifts abruptly, showing dynamic shifts akin to precessional motion. After internal conversion to the  $S_0$  state, there's a sequential decrease in  $\theta_{4-1-2-28}$  and increase in  $\theta_{15-1-2-28}$ , leading both angles to settle into slight oscillations within the M region - signaling the end of the photoisomerization journey.

In molecular dynamics (MD) simulations, we use the velocity-Verlet algorithm, which largely preserves total energy if appropriate time steps are utilized. However, when performing TSH calculations for excited states based on multi-configurational and multi-reference wavefunctions, structural changes during MD calculations can cause the orbitals within the active

space to swap with outer orbitals, or states included in the state averaging to swap with external states, which can potentially disrupt the conservation of total energy. In this study, using the OM2/MRCI method, we observe cases where energy conservation is compromised due to such reasons. Significant discrepancies are particularly evident for 1s.

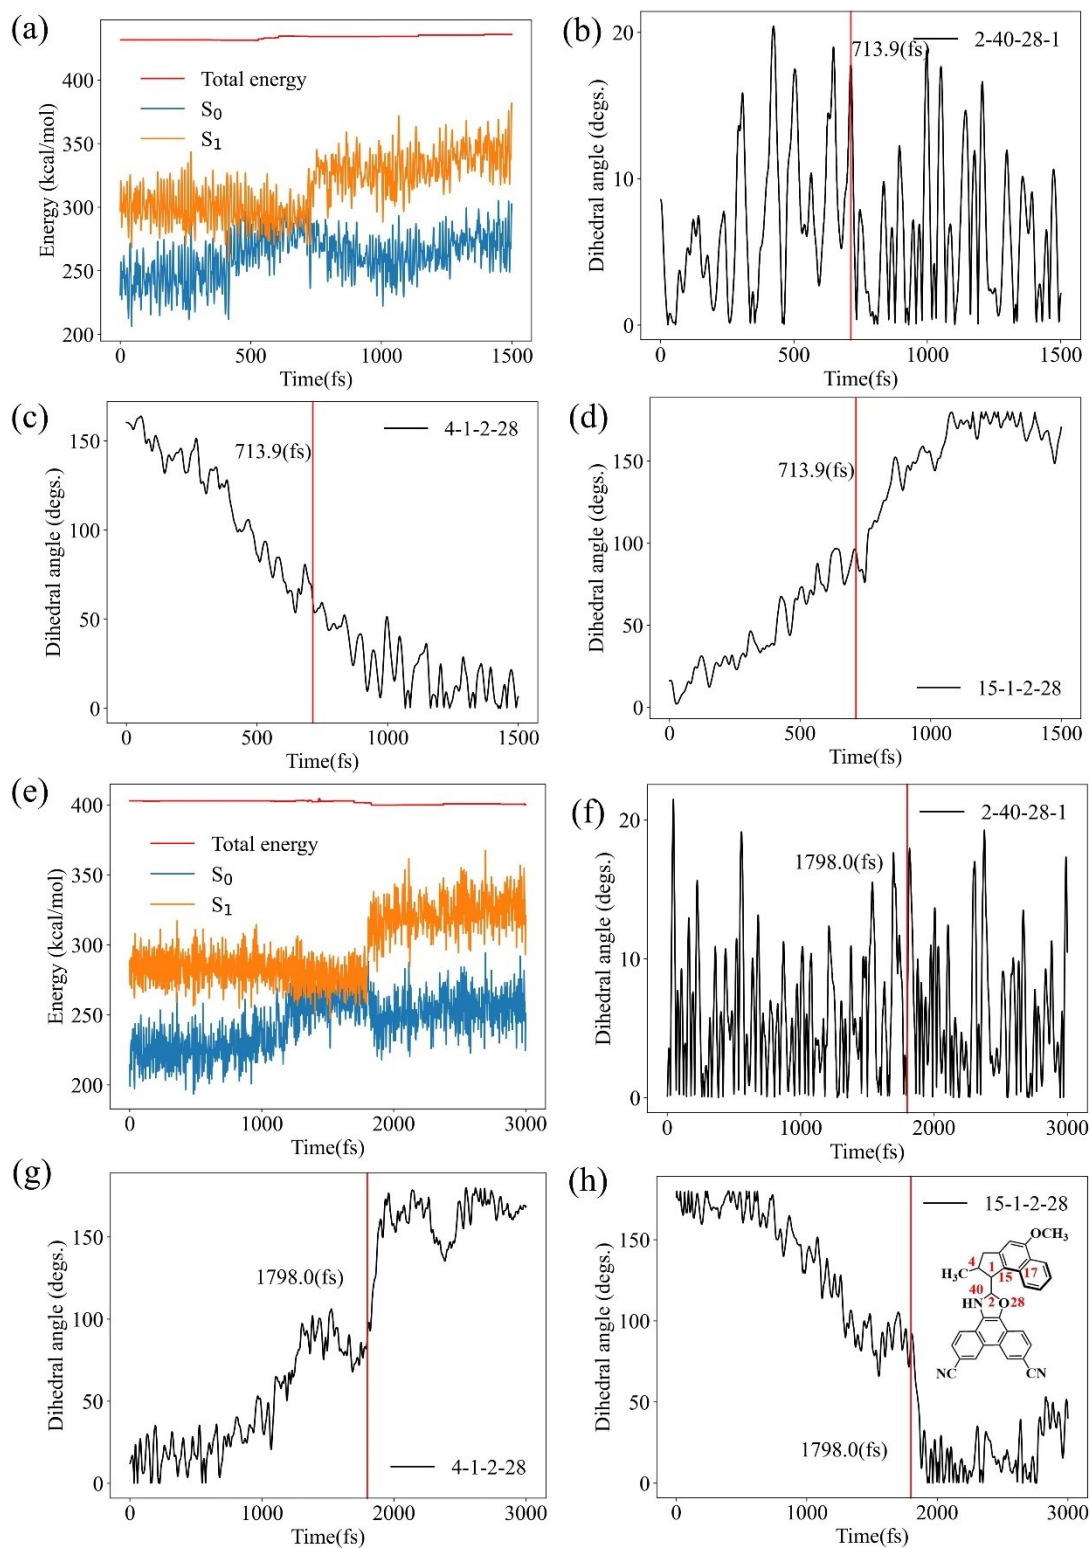

**Figure S11.** (a) Variation of  $S_0$  and  $S_1$  energies and (b-d) variations of the dihedral angles  $\theta_{2-40-28-1}$ ,  $\theta_{4-1-2-28}$ , and  $\theta_{15-1-2-28}$ , along a typical trajectory for Xs-EP; (e) Variation of  $S_0$  and  $S_1$  energies and (f-h) variations of the dihedral angles  $\theta_{2-40-28-1}$ ,  $\theta_{4-1-2-28}$ , and  $\theta_{15-1-2-28}$ , along a typical trajectory for Xs-ZP.

To gain a thorough insight into the isomerization mechanism, we explore two representative trajectories, namely EP  $\rightarrow$  ZM and ZP  $\rightarrow$  EM, which represent pivotal transitions within the molecular motor's isomerization processes. Starting with EP  $\rightarrow$  ZM, the journey begins as the EP isomer is energetically uplifted to the  $S_1$  state, setting the molecular motor on a path across the excited-state potential energy landscape until it descends back to the ground state at 713.9 fs. Illustrated in Figure S11(b-d), this path witnesses the dihedral angle  $\theta_{4-1-2-28}$ , a critical link between the rotor and stator, ascend from its optimized EP form, experiencing fluctuations to stabilize at a 20° inclination by 713.9 fs. Concurrently, the dihedral angle  $\theta_{15-1-2-28}$  exhibits a gradual decrement. Notably, the dihedral angle  $\theta_{2-40-28-1}$  sees a swift increase, heralding the trajectory's venture into the CI region, alongside a pronounced pyramidalization at the carbon atom nestled within the stator-axle. The culmination of this photoisomerization sequence is signified by the dihedral angles  $\theta_{4-1-2-28}$  and  $\theta_{15-1-2-28}$  achieving equilibrium.

Turning our focus to the ZP  $\rightarrow$  EM transition depicted in Figure S11(f-h), the narrative unfolds with the dihedral angle  $\theta_{4-1-2-28}$  embarking from its initial stance, navigating through CI geometries at 1798.0 fs, before gracefully transitioning to the ground state. This relaxation phase sees the dihedral angle  $\theta_{15-1-2-28}$  diminish from the ZP isomer's 170°, alongside a significant swell in the dihedral angle  $\theta_{2-40-28-1}$ , a movement that underscores the carbon atom's pyramidalization at the stator-axle. Impressively, the dihedral angle  $\theta_{4-1-2-28}$  escalates from a modest 20° in ZP to a striking 170° throughout the ZP  $\rightarrow$  EM isomerization, leading to a successful conclusion as the dihedral angles  $\theta_{4-1-2-28}$  and  $\theta_{15-1-2-28}$  stabilize at predetermined coordinates, effectively charting the isomerization's course.

## 9. Simulated time-dependent fluorescence and dark state

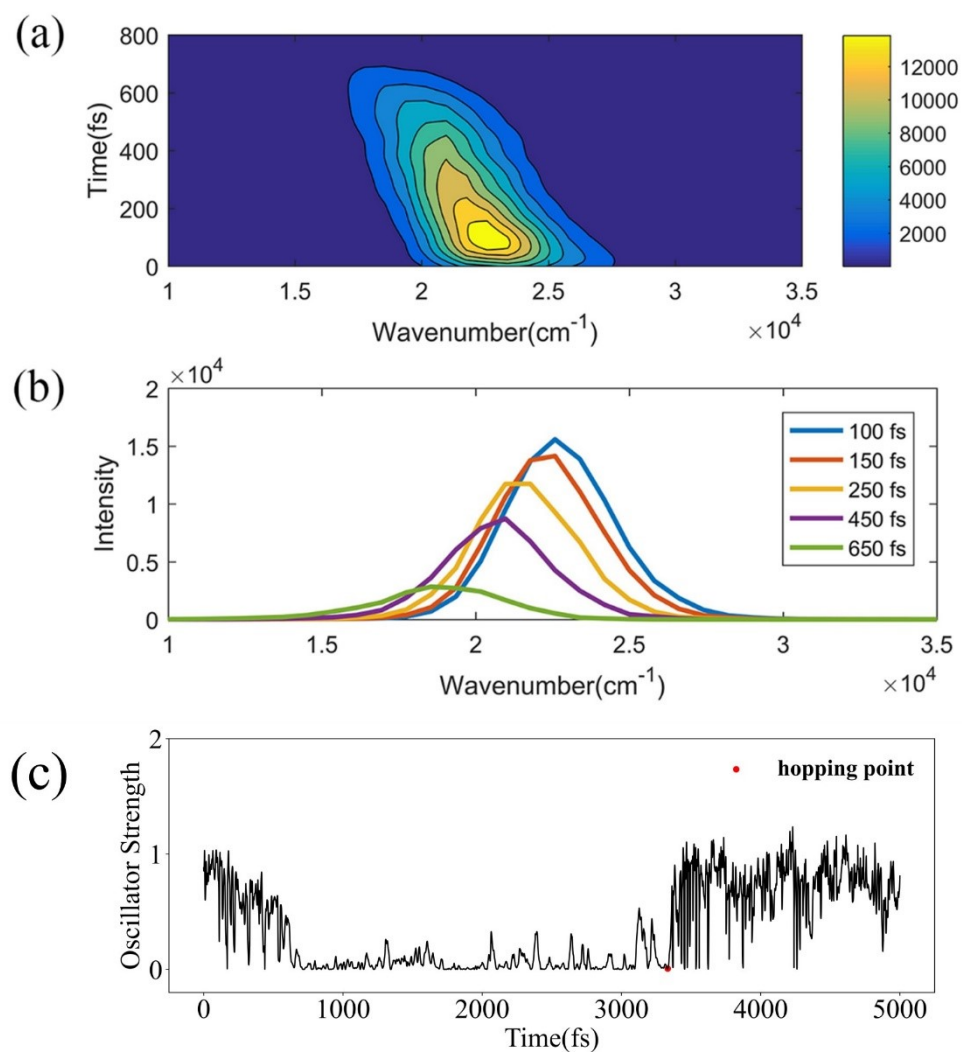

**Figure S12.** The simulated time-dependent fluorescence emission spectrum of 1s: (a) a two-dimensional contour plot that illustrates the emission intensity in relation to both the simulation time and the wavenumber of photons; (b) fluorescence emission spectrum at various times; (c) The oscillator strength between the ground state ( $S_0$ ) and the first excited state ( $S_1$ ). The hopping time is displayed by a red point.



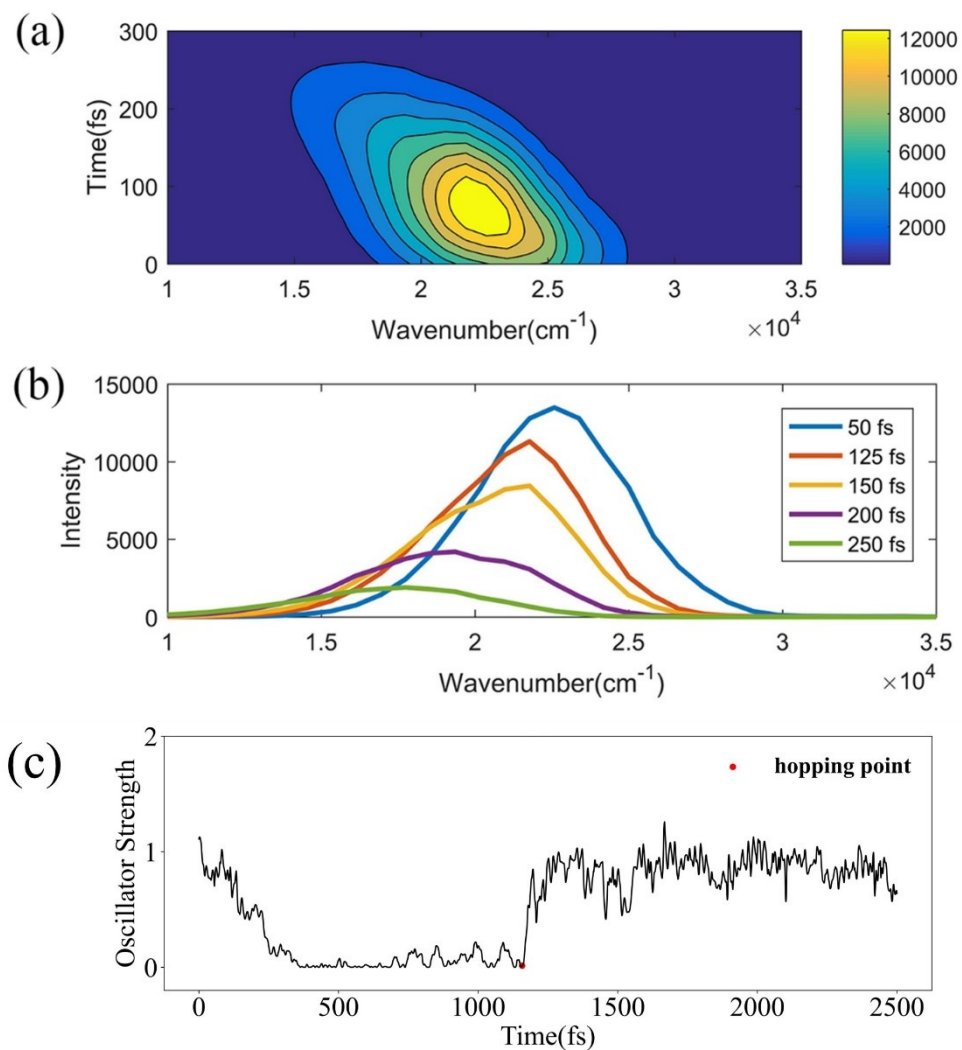

**Figure S13.** The simulated time-dependent fluorescence emission spectrum of 2s: (a) a two-dimensional contour plot that illustrates the emission intensity in relation to both the simulation time and the wavenumber of photons; (b) fluorescence emission spectrum at various times; (c) The oscillator strength between the ground state ( $S_0$ ) and the first excited state ( $S_1$ ). The hopping time is displayed by a red point.

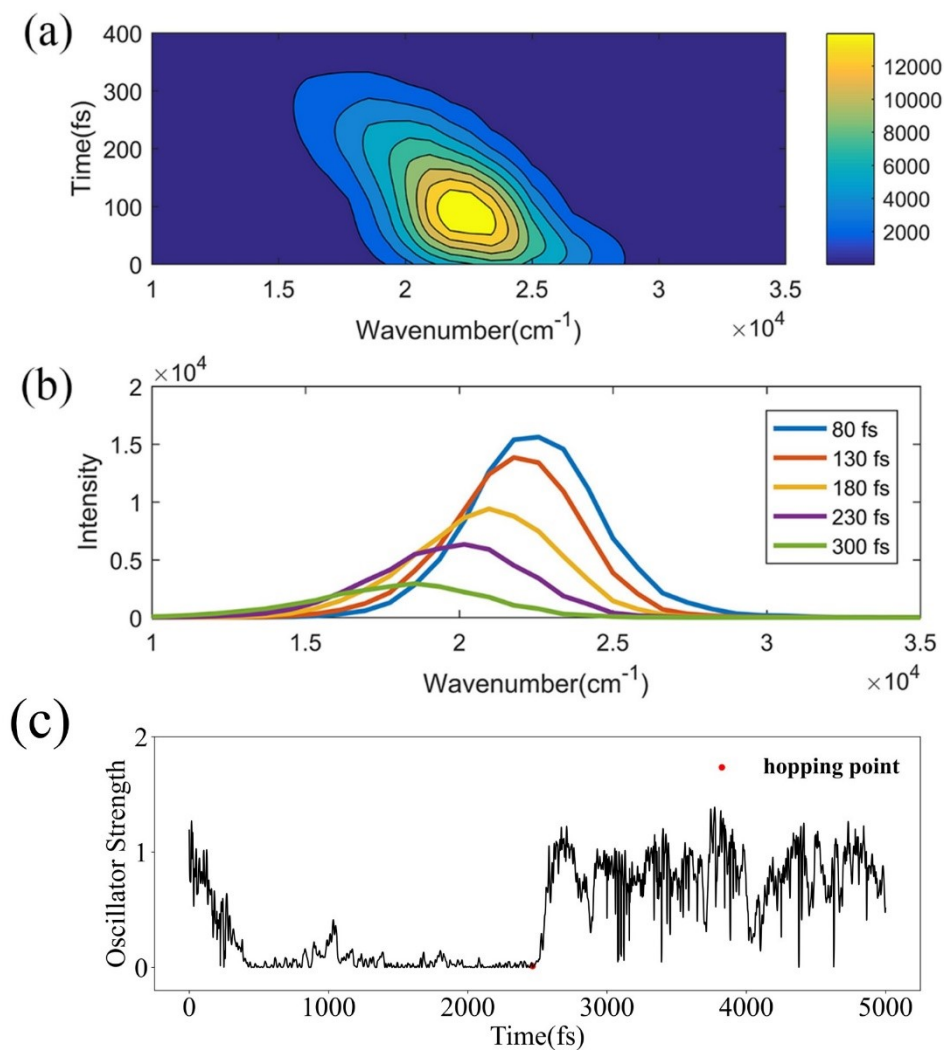

**Figure S14.** The simulated time-dependent fluorescence emission spectrum of 6s: (a) a two-dimensional contour plot that illustrates the emission intensity in relation to both the simulation time and the wavenumber of photons; (b) fluorescence emission spectrum at various times; (c) The oscillator strength between the ground state ( $S_0$ ) and the first excited state ( $S_1$ ). The hopping time is displayed by a red point.

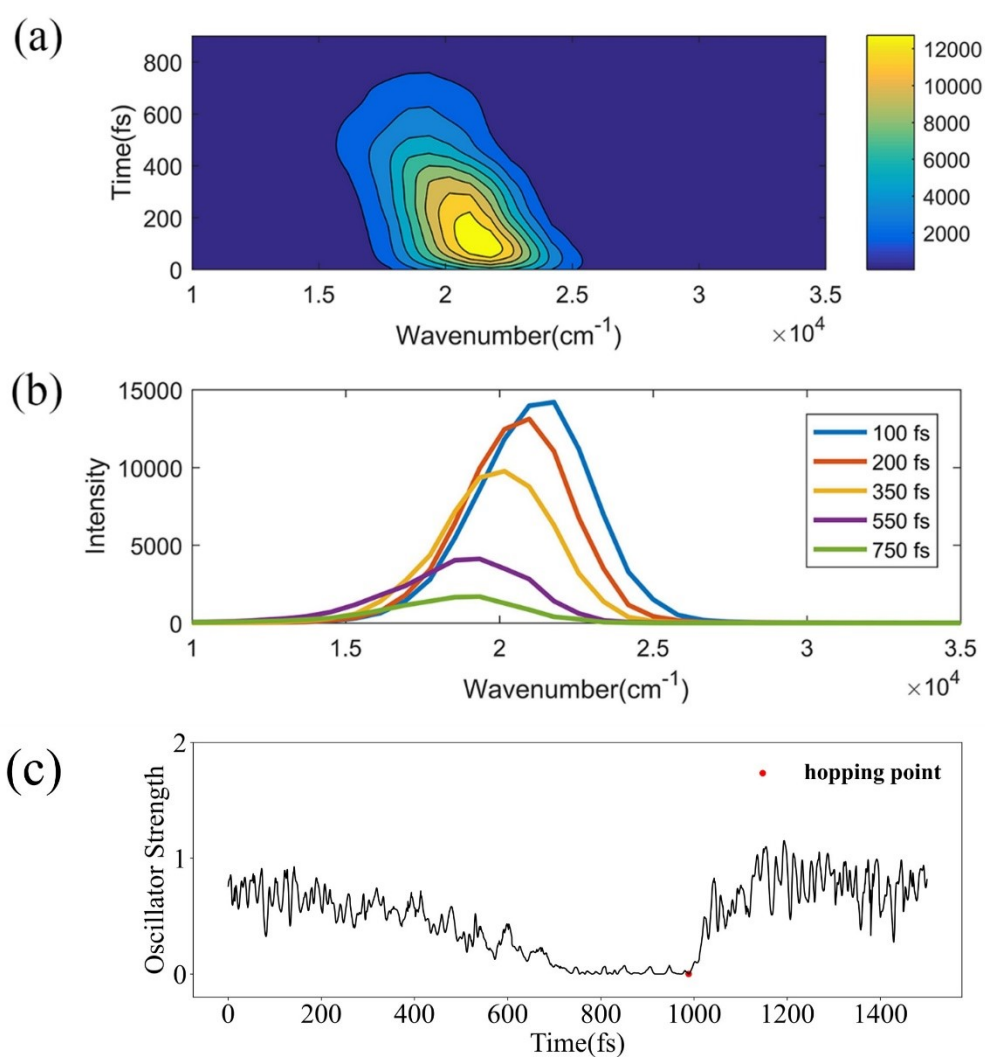

**Figure S15.** The simulated time-dependent fluorescence emission spectrum of Xs-EP: (a) a two-dimensional contour plot that illustrates the emission intensity in relation to both the simulation time and the wavenumber of photons; (b) fluorescence emission spectrum at various times; (c) The oscillator strength between the ground state ( $S_0$ ) and the first excited state ( $S_1$ ). The hopping time is displayed by a red point.

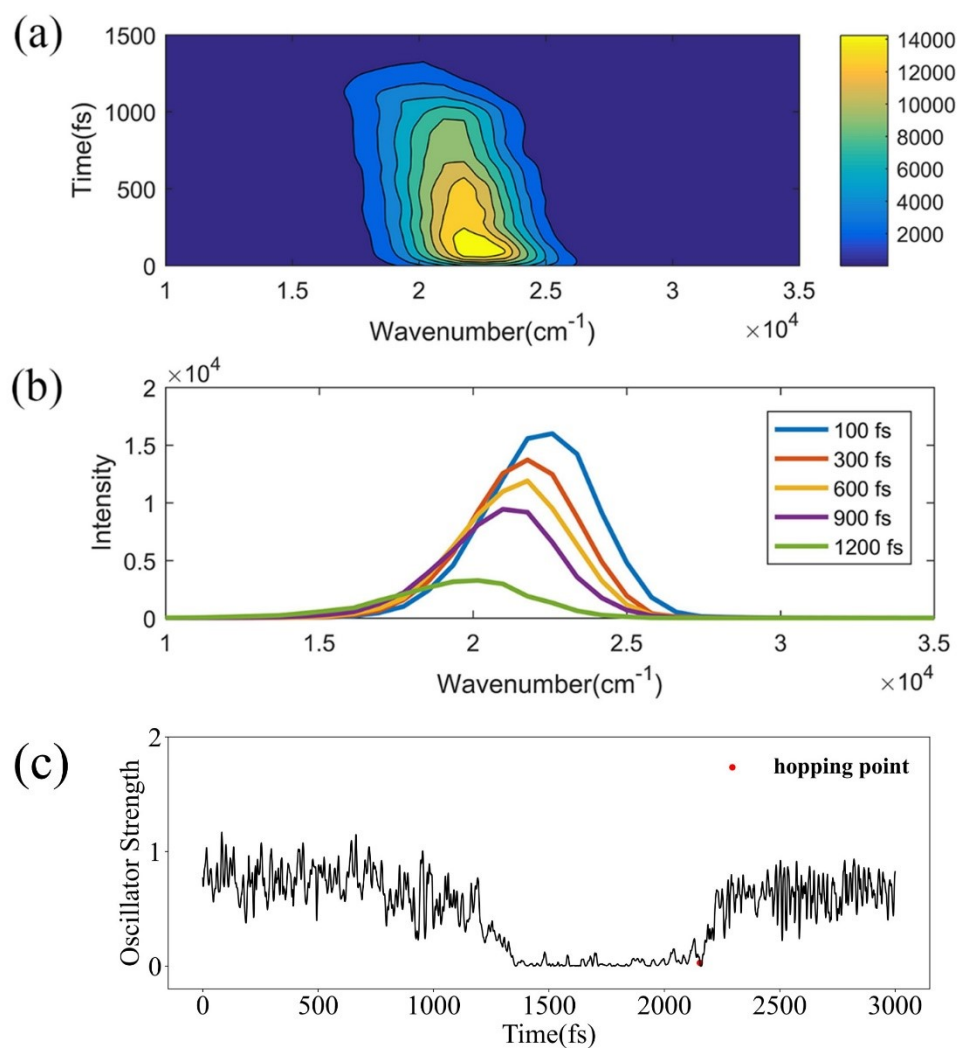

**Figure S16.** The simulated time-dependent fluorescence emission spectrum of Xs-ZP: (a) a two-dimensional contour plot that illustrates the emission intensity in relation to both the simulation time and the wavenumber of photons; (b) fluorescence emission spectrum at various times; (c) The oscillator strength between the ground state ( $S_0$ ) and the first excited state ( $S_1$ ). The hopping time is displayed by a red point.

**Table S15.** The average lifetime, the time of fluorescence emission quenching, and dark state duration for four motors.

|    |    | Average lifetime (ps) | Time of fluorescence emission quenching (ps) | Dark state duration (ps) |
|----|----|-----------------------|----------------------------------------------|--------------------------|
| 1s | P  | 2.56                  | 0.70                                         | 1.86                     |
| 2s | P  | 1.16                  | 0.26                                         | 0.90                     |
| 6s | P  | 2.40                  | 0.34                                         | 2.06                     |
| Xs | EP | 0.85                  | 0.76                                         | 0.09                     |
|    | ZP | 1.58                  | 1.32                                         | 0.26                     |

The time-resolved fluorescence emission spectrum during the P → M (1s, 2s, 6s) and EP → ZM, ZP → EM (Xs) photoisomerization processes were computed using 175, 242, 233 trajectories for 1s-P, 2s-P, 6s-P, respectively, and 220 and 179 trajectories for Xs-EP and Xs-ZP within our simulations. These calculations stem from nonadiabatic dynamics simulation outcomes, factoring in state energy, oscillator strengths, and the instantaneous electronic state of all trajectories throughout the simulation. To calculate the fluorescence intensity at each point in time, we employed a 10 fs time step, aggregating the oscillator strengths of all trajectories that remained in the excited state at that moment. It's worth mentioning that this calculation approach is succinctly outlined here; for a more comprehensive theoretical framework, readers are encouraged to consult the works of Lan *et al.*<sup>5</sup> and Jin *et al.*<sup>6</sup>

The emission intensity  $I(\omega, t)^{emission}$  at time  $t$  is calculated as follows:

$$I(\omega, t)^{emission} \propto \omega^3 \sum_{i=1}^{N_1} f(\omega_i, t) \delta(\omega - \omega_i)$$

Here,  $f(\omega_i, t)$  represents the oscillator strength of the  $i$ th trajectory at time  $t$ , and  $N_1$  is the number of trajectories remaining in the  $S_1$  excited state. The cumulative emissions over time and frequency domains are given by

$$I(t)^{emission} = \int I(\omega, t)^{emission} d\omega$$

and

$$I(\omega)^{emission} = \int I(\omega, t)^{emission} dt$$

The two-dimensional contour plot displaying the fluorescence emission intensity across both time and frequency domains are shown in Figures S12(a), S13(a), and S14(a) for 1s-P, 2s-P, and 6s-P, and in Figures S15(a) and S16(a) for Xs-EP and Xs-ZP. These plots reveal ultrafast quenching of fluorescence emissions before 700, 260, 340 fs for 1s-P, 2s-P, and 6s-P, and 760, 1320 fs for Xs-EP and Xs-ZP, alongside a noticeable red-shift in the emission photon's wavenumber. Additionally, the figures include wavelength-resolved fluorescence emission spectra at various times: 100-650, 50-250, 80-300 fs for 1s-P, 2s-P, and 6s-P, and 100-750, 100-1200 fs for Xs-EP and Xs-ZP. Taking Figure S12(b) as an instance, the central wavenumber of the emission spectrum shifts from about  $1.50 \times 10^4 \text{ cm}^{-1}$  at 100 fs to roughly  $0.25 \times 10^4 \text{ cm}^{-1}$  at 650 fs, with the intensity at the latter time point being significantly diminished (approximately one-sixth of its

initial value). This observation underscores the red-shift and quenching of the fluorescence emission spectrum. Given the fluorescence emission quenching times of around 700, 260, 340 fs for 1s-P, 2s-P, 6s-P, and 760, 1320 fs for Xs-EP and Xs-ZP, which are considerably shorter than the lifetimes of the  $S_1$  excited state (2560, 1160, 2400 fs for 1s-P, 2s-P, 6s-P, and 850, 1580 fs for Xs-EP and Xs-ZP respectively), it is inferred that a "dark state" plays a role during the photoisomerization processes of these molecules. The durations of the "dark state" in the photoisomerization process, determined through nonadiabatic dynamics simulations for 1s-P, 2s-P, 6s-P, Xs-EP, and Xs-ZP, are detailed in Table S15. It's found that the "dark state" durations for 1s, 2s, and 6s span 1.86, 0.90, and 2.06 ps, markedly longer than the 0.09 and 0.26 ps for Xs-EP and Xs-ZP, respectively.

## 10. Active space orbitals for 1s, 2s, 6s, and Xs

1s (8,9)

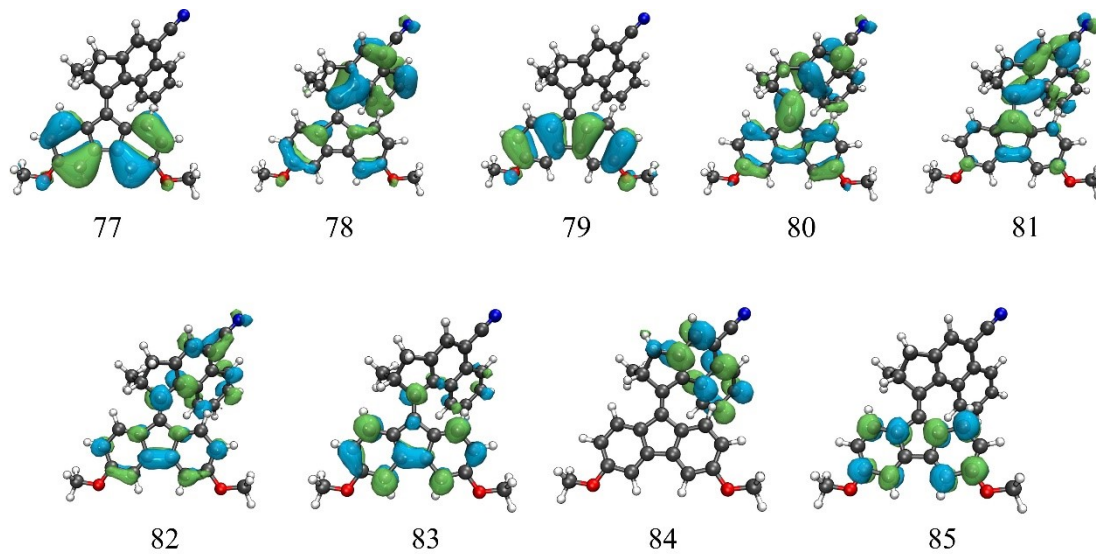

2s (10,10)

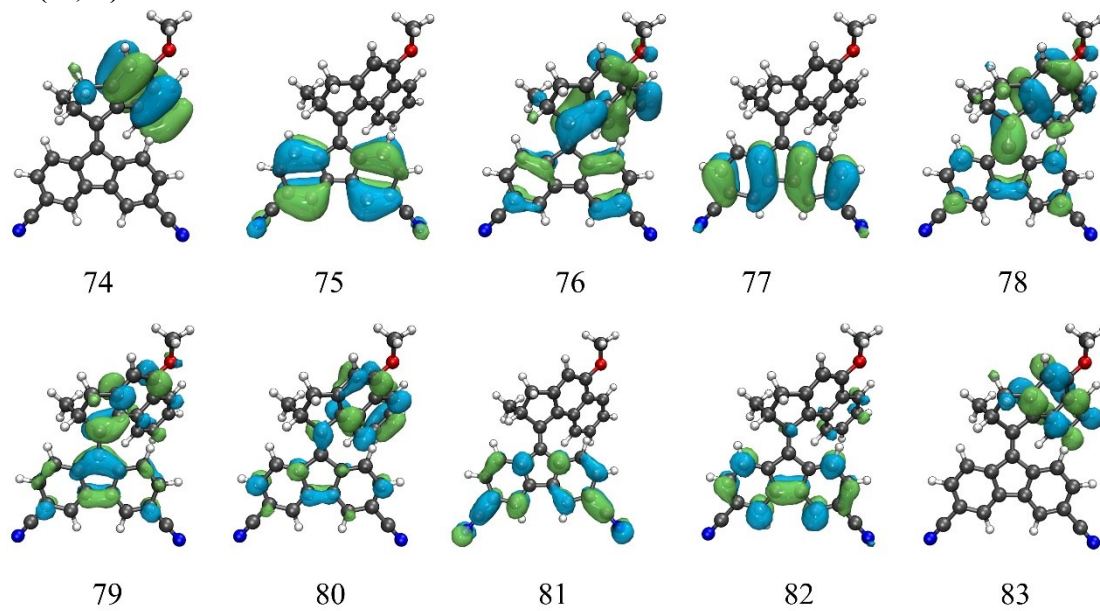

6s (8,8)

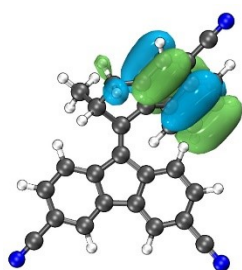

73

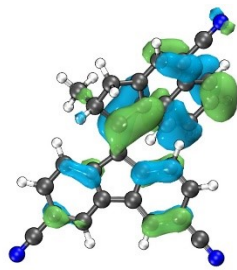

74

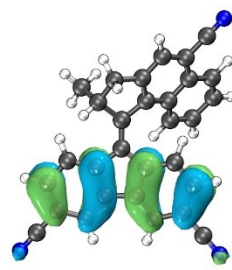

75

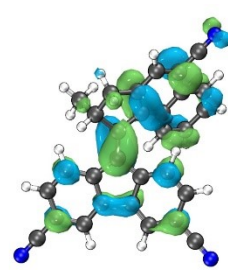

76

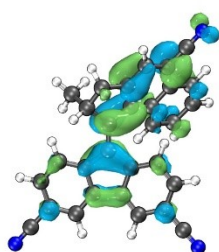

77

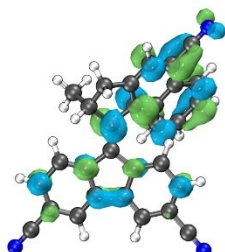

78

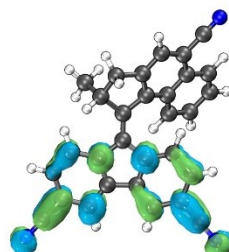

80

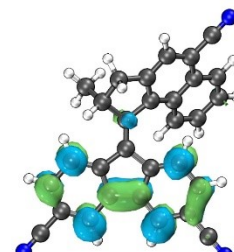

81

Xs (8,8)

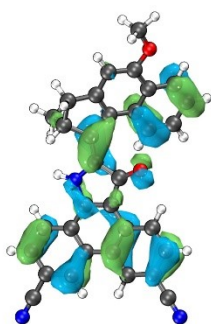

87

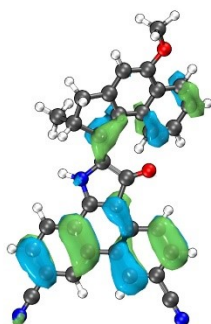

88

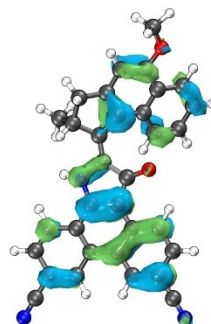

89

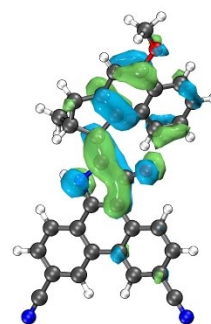

90

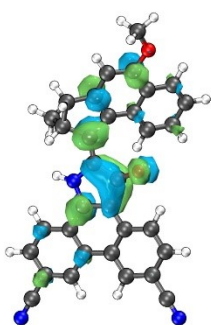

91

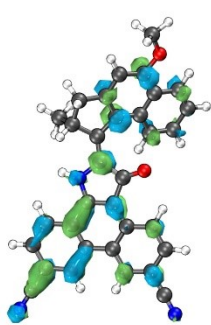

92

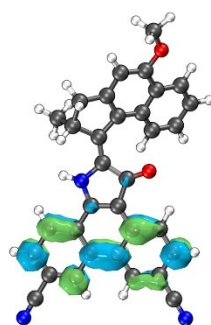

93

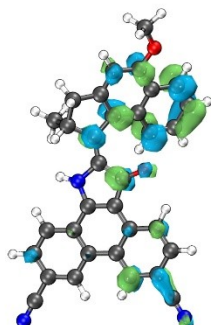

94



## References

- 1 Thiel, W. MNDO Program, Version7.0; Max-Planck-Institut für Kohlenforschung: Mulheim, Germany, 2007.
- 2 Gaussian 09, Revision D.01, M. J. Frisch, G. W. Trucks, H. B. Schlegel, G. E. Scuseria, M. A. Robb, J. R. Cheeseman, G. Scalmani, V. Barone, G. A. Petersson, H. Nakatsuji, X. Li, M. Caricato, A. V. Marenich, J. Bloino, B. G. Janesko, R. Gomperts, B. Mennucci, H. P. Hratchian, J. V. Ortiz, A. F. Izmaylov, J. L. Sonnenberg, D. Williams-Young, F. Ding, F. Lipparini, F. Egidi, J. Goings, B. Peng, A. Petrone, T. Henderson, D. Ranasinghe, V. G. Zakrzewski, J. Gao, N. Rega, G. Zheng, W. Liang, M. Hada, M. Ehara, K. Toyota, R. Fukuda, J. Hasegawa, M. Ishida, T. Nakajima, Y. Honda, O. Kitao, H. Nakai, T. Vreven, K. Throssell, J. A. Montgomery, Jr., J. E. Peralta, F. Ogliaro, M. J. Bearpark, J. J. Heyd, E. N. Brothers, K. N. Kudin, V. N. Staroverov, T. A. Keith, R. Kobayashi, J. Normand, K. Raghavachari, A. P. Rendell, J. C. Burant, S. S. Iyengar, J. Tomasi, M. Cossi, J. M. Millam, M. Klene, C. Adamo, R. Cammi, J. W. Ochterski, R. L. Martin, K. Morokuma, O. Farkas, J. B. Foresman, and D. J. Fox, Gaussian, Inc., Wallingford CT, 2013.
- 3 L. Pfeifer, M. Scherübl, M. Fellert, W. Danowski, J. Cheng, J. Pol and B. L. Feringa, Photoefficient 2nd generation molecular motors responsive to visible light, *Chem Sci*, 2019, **10**, 8768–8773.
- 4 M. Barbatti, M. Bondanza, R. Crespo-Otero, B. Demoulin, P. O. Dral, G. Granucci, F. Kossoski, H. Lischka, B. Mennucci, S. Mukherjee, M. Pederzoli, M. Persico, M. Pinheiro Jr, J. Pittner, F. Plasser, E. Sangiogo Gil and L. Stojanovic, Newton-X Platform: New Software Developments for Surface Hopping and Nuclear Ensembles, *J Chem Theory Comput*, 2022, **18**, 6851–6865.
- 5 Z. Lan, Y. Lu, O. Weingart and W. Thiel, Nonadiabatic Decay Dynamics of a Benzylidene Malononitrile, *J Phys Chem A*, 2012, **116**, 1510–1518.
- 6 H. Jin, M. Liang, S. Arzhantsev, X. Li and M. Maroncelli, Photophysical Characterization of Benzylidene Malononitriles as Probes of Solvent Friction, *J Phys Chem B*, 2010, **114**, 7565–7578.
